# Supplementary figures and images for: Differences in metabolic and mitogenic signalling of insulin glargine and insulin aspart B10 in rats
Source: Springer Nature journal article supplement (doi:10.1007/s00125-013-2923-z), 2013-05-07

ESM Fig. 1

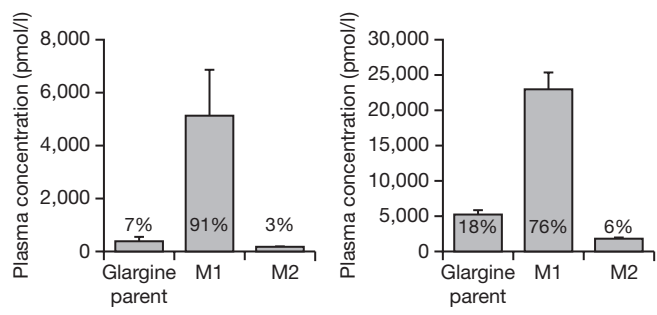

Supplement: MOESM1 [file 8091600]

ESM Fig. 2

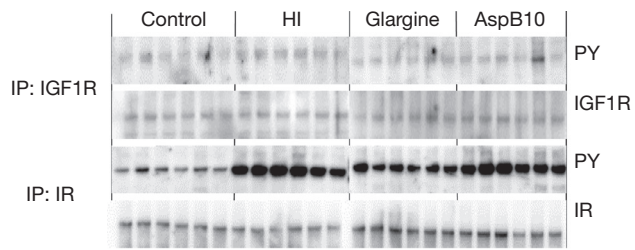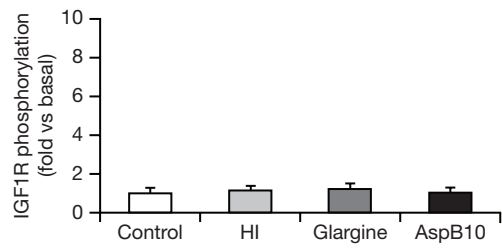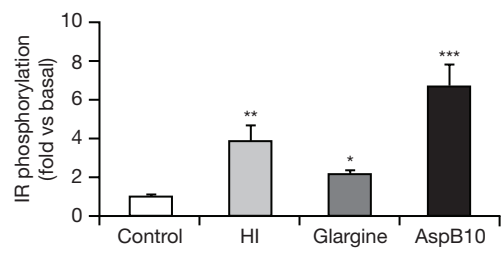

Supplement: MOESM2 [file 8091600]
